# Supplementary material for: SweC and SweD are essential co-factors of the FtsEX-CwlO cell wall hydrolase complex in Bacillus subtilis
Source: PubMed Central journal article supplement (PMC6705773; doi:10.1371/journal.pgen.1008296), 2019-08-22
Supplement: pgen.1008296.s013.pdf [file pgen.1008296.s013.pdf]

## SUPPLEMENTARY MATERIALS AND METHODS

**TABLE S1: *Bacillus subtilis* strains used in this study**

| Strain  | Genotype                                                                              | Source                | Figure                  |
|---------|---------------------------------------------------------------------------------------|-----------------------|-------------------------|
| PY79    | wild-type                                                                             | Youngman et al., 1983 | 1, 3, 7, S1, S4, S5, S7 |
| BDR2649 | <i>sacA::Pveg-mCherry (spec)</i>                                                      | Meisner et al., 2013  | Fig. 2, S3              |
| BDR776  | <i>amyE::PxyIA-gfp-spoIVFA (cat)</i>                                                  | This study            | Fig. 3                  |
| BJM054  | <i>cwIO::cat</i>                                                                      | Meisner et al., 2013  | Fig. 4, S4              |
| BJM072  | <i>ftsX::kan</i>                                                                      | Meisner et al., 2013  | Fig. 7                  |
| BJM076  | <i>lytE::cat</i>                                                                      | Meisner et al., 2013  | Fig. 1                  |
| BJM182  | <i>lytE::tet, ycgO::Pspank-lytE (erm)</i>                                             | Meisner et al., 2013  | Fig. 1                  |
| BJM196  | <i>lytE::tet, ycgO::Pspank-lytE (erm), cwIO::kan</i>                                  | Meisner et al., 2013  | Fig. 1                  |
| BJM272  | <i>ftsEX::cat</i>                                                                     | Meisner et al., 2013  | Fig. 4, S4              |
| BYB021  | <i>ycgO::Pspank-lytE (spec)</i>                                                       | This study            |                         |
| BYB032  | <i>lytE::cat, ycgO::Pspank-lytE (spec)</i>                                            | This study            | Fig. 6, S5              |
| BYB035  | <i>lytE::cat, ycgO::Pspank-lytE (spec), cwIO::kan</i>                                 | This study            | Fig. S5                 |
| BYB036  | <i>lytE::cat, ycgO::Pspank-lytE (spec), ftsEX::kan</i>                                | This study            | Fig. S5                 |
| BYB265  | <i>cwIO::cat, ycgO::Pspank-5'UTR-cwIO (spec), sacA::Pveg-mCherry (tet)</i>            | This study            | Fig. S3                 |
| BYB279  | <i>cwIO::cat, ycgO::Pspank-5'UTR-cwIO (spec), sacA::Pveg-mCherry (tet), lytE::erm</i> | This study            | Fig. 2, S3              |
| BYB287  | <i>cwIO::cat, ycgO::Pspank-5'UTR-cwIO (spec), sacA::Pveg-mCherry (tet), lytE::kan</i> | This study            | Fig. S7                 |
| BYB304  | $\Delta$ <i>sweC::lox72</i>                                                           | This study            | Fig. 4, S1              |
| BYB325  | $\Delta$ <i>sweC::lox72, ycgO::Pspank-lytE (erm), lytE::cat</i>                       | This study            | Fig. 1                  |
| BYB329  | $\Delta$ <i>sweD::lox72, ycgO::Pspank-lytE (erm), lytE::cat</i>                       | This study            | Fig. 1                  |
| BYB339  | <i>sweDC::kan</i>                                                                     | This study            | Fig. 4, 6               |
| BYB356  | <i>ycgO::Pspank-sweDC (erm), sweDC::kan</i>                                           | This study            | Fig. 1                  |
| BYB358  | <i>ycgO::Pspank-sweDC (erm), sweDC::kan, lytE::cat</i>                                | This study            | Fig. 1                  |
| BYB360  | <i>ycgO::Pspank-sweDC (erm), sweDC::kan, sacA::Pveg-mCherry (tet)</i>                 | This study            | Fig. S3                 |
| BYB362  | <i>ycgO::Pspank-sweDC (erm), sweDC::kan, lytE::cat, sacA::Pveg-mCherry (tet)</i>      | This study            | Fig. 2, S3              |
| BYB366  | <i>sweDC::kan, lytE::cat clone#1</i>                                                  | This study            |                         |
| BYB367  | <i>sweDC::kan, lytE::cat clone#2</i>                                                  | This study            |                         |
| BYB368  | <i>sweDC::kan, lytE::cat clone#3</i>                                                  | This study            |                         |
| BYB370  | <i>sacA::Pveg-mCherry (spec), sweDC::kan</i>                                          | This study            | Fig. 2                  |
| BYB371  | <i>sacA::Pveg-mCherry (spec), cwIO::cat</i>                                           | This study            | Fig. 2                  |
| BYB372  | <i>sacA::Pveg-mCherry (spec), ftsEX::cat</i>                                          | This study            | Fig. 2                  |
| BYB373  | <i>sacA::Pveg-mCherry (spec), lytE::cat</i>                                           | This study            | Fig. 2                  |
| BYB374  | <i>sacA::Pveg-mCherry (spec), sweDC::kan, cwIO::cat</i>                               | This study            | Fig. 2                  |
| BYB377  | <i>ycgO::Pspank-sweDC (erm), sweDC::kan, cwIO::cat</i>                                | This study            | Fig. 1                  |
| BYB405  | <i>ftsEX::kan, amyE::ftsE(K41A)-ftsX (spec)</i>                                       | This study            | Fig. S4                 |
| BYB439  | <i>ftsEX::kan, ycgO::Pspank-ftsEX (erm), lytE::cat, sacA::Pveg-mCherry (tet)</i>      | This study            | Fig. 2                  |
| BYB461  | <i>ftsEX (erm)</i>                                                                    | This study            |                         |
| BYB493  | $\Delta$ <i>sweC::lox72, ycgO::Pspank-sweC (spec)</i>                                 | This study            | Fig. 4, S1              |
| BYB515  | <i>lytE::cat, ycgO::Pspank-lytE (spec), sweDC::kan</i>                                | This study            | Fig. 6, S5, S7, S8      |
| BYB522  | <i>ftsE(V176F) (erm)</i>                                                              | This study            |                         |
| BYB523  | <i>ftsX(S26Y) (erm)</i>                                                               | This study            |                         |
| BYB529  | <i>lytE::cat, ycgO::Pspank-lytE (spec), sweDC::kan, ftsE(V176F) (erm)</i>             | This study            | Fig. 6, S7              |

|         |                                                                                                                       |            |            |
|---------|-----------------------------------------------------------------------------------------------------------------------|------------|------------|
| BYB530  | <i>lytE::cat, ycgO::Pspank-lytE (spec), sweDC::kan, ftsX(S26Y) (erm)</i>                                              | This study | Fig. 6, S7 |
| BYB533  | <i>lytE::cat, ycgO::Pspank-lytE (spec), sweDC::kan, walH::tet</i>                                                     | This study | Fig. 6, S7 |
| BYB546  | $\Delta$ <i>sweD::lox72</i>                                                                                           | This study | Fig. 4, S1 |
| BYB550  | $\Delta$ <i>sweD::lox72, ycgO::Pspank-sweD (spec)</i>                                                                 | This study | Fig. 4, S1 |
| BYB552  | $\Delta$ <i>sweD::lox72, ycgO::Pspank-sweD (spec), lytE::cat</i>                                                      | This study | Fig. S1    |
| BYB558  | $\Delta$ <i>sweC::lox72, ycgO::Pspank-sweC (spec), lytE::cat</i>                                                      | This study | Fig. S1    |
| BYB563  | $\Delta$ <i>sweD::lox72, ycgO::Pspank-sweD (spec), cw/O::cat</i>                                                      | This study | Fig. S2    |
| BYB564  | $\Delta$ <i>sweD::lox72, ycgO::Pspank-sweD (spec), ftsEX::kan</i>                                                     | This study | Fig. S3    |
| BYB565  | $\Delta$ <i>sweC::lox72, ycgO::Pspank-sweC (spec), cw/O::cat</i>                                                      | This study | Fig. S4    |
| BYB566  | $\Delta$ <i>sweC::lox72, ycgO::Pspank-sweC (spec), ftsEX::kan</i>                                                     | This study | Fig. S5    |
| BYB583  | <i>ftsEX::kan, amyE::ftsE(H195Y)-ftsX (spec)</i>                                                                      | This study | Fig. S4    |
| BYB584  | <i>ftsEX::kan, amyE::ftsE(D162A)-ftsX (spec)</i>                                                                      | This study | Fig. S4    |
| BYB585  | <i>lytE::cat, ycgO::Pspank-lytE (spec), sweDC::kan, ftsE(V176F) (erm), walH::tet</i>                                  | This study | Fig. 6, S7 |
| BYB587  | <i>lytE::cat, ycgO::Pspank-lytE (spec), sweDC::kan, ftsX(S26Y) (erm), walH::tet</i>                                   | This study | Fig. 6, S7 |
| BYB592  | $\Delta$ <i>sweD::lox72 amyE::sweD-sfGFP (kan)</i>                                                                    | This study | Fig. S9    |
| BYB660  | $\Delta$ <i>lytE::lox72, yvbJ::PxylA-lytE (cat), sweDC::kan</i>                                                       | This study | Fig. 5     |
| BYB1181 | <i>sacA::Pveg-mcherry (tet), lytE::cat, yvbJ::Pspank-lytE (spec)</i>                                                  | This study | Fig. S3    |
| BYB1185 | <i>sacA::Pveg-mcherry (tet), lytE::cat, yvbJ::Pspank-lytE (spec), cw/O::kan</i>                                       | This study | Fig. S3    |
| BYB1225 | $\Delta$ <i>lytE::lox72, yvbJ::PxylA-lytE (cat), sweDC::kan, ycgO::Pspank-sweDC (erm)</i>                             | This study | Fig. 5     |
| BYB1226 | $\Delta$ <i>lytE::lox72, yvbJ::PxylA-lytE (cat), sweDC::kan, ycgO::Pspank-sweDC(<math>\Delta</math>25-57) (spec)</i>  | This study | Fig. 5     |
| BYB1228 | $\Delta$ <i>lytE::lox72, yvbJ::PxylA-lytE (cat), sweDC::kan, ycgO::Pspank-sweDC(<math>\Delta</math>74-108) (spec)</i> | This study | Fig. 5     |
| BYB1229 | $\Delta$ <i>lytE::lox72, yvbJ::PxylA-lytE (cat) sweDC::kan, ycgO::Pspank-sweDC(D104A V105A) (spec)</i>                | This study | Fig. 5     |
| BYB1230 | $\Delta$ <i>lytE::lox72, yvbJ::PxylA-lytE (cat) sweDC::kan, ycgO::Pspank-sweDC(<math>\Delta</math>LysM) (spec)</i>    | This study | Fig. 5     |
| BYB1231 | <i>sweDC::kan, ycgO::Pspank-sweDC (erm)</i>                                                                           | This study | Fig. 5     |
| BYB1232 | <i>sweDC::kan, ycgO::Pspank-sweDC(<math>\Delta</math>25-57) (spec)</i>                                                | This study | Fig. 5     |
| BYB1234 | <i>sweDC::kan, ycgO::Pspank-sweDC(<math>\Delta</math>74-108) (spec)</i>                                               | This study | Fig. 5     |
| BYB1235 | <i>sweDC::kan, ycgO::Pspank-sweDC(D104A V105A) (spec)</i>                                                             | This study | Fig. 5     |
| BYB1236 | <i>sweDC::kan, ycgO::Pspank-sweDC(<math>\Delta</math>LysM) (spec)</i>                                                 | This study | Fig. 5     |
| BYB1446 | <i>sacA::Pveg-mCherry (tet), lytE::cat, yvbJ::Pspank-lytE (spec), sweDC::erm</i>                                      | This study | Fig. S3    |
| BYB1447 | <i>sacA::Pveg-mCherry (tet), lytE::cat, yvbJ::Pspank-lytE (spec), cw/O::kan, sweDC::erm</i>                           | This study | Fig. S3    |
| BYB1448 | <i>walH::tet</i>                                                                                                      | This study |            |
