# Supplementary material for: SweC and SweD are essential co-factors of the FtsEX-CwlO cell wall hydrolase complex in Bacillus subtilis
Source: PubMed Central journal article supplement (PMC6705773; doi:10.1371/journal.pgen.1008296), 2019-08-22
Supplement: pgen.1008296.s014.pdf [file pgen.1008296.s014.pdf]

**TABLE S2: Plasmids used in this study**

| Plasmid | Description                                 | Source                       |
|---------|---------------------------------------------|------------------------------|
| pYB02   | ycgO::Pspank-sweDC (erm)                    | This study                   |
| pYB04   | His6-SUMO-sweC-soluble domain (amp)         | This study                   |
| pYB05   | His6-SUMO-sweD-soluble domain (amp)         | This study                   |
| pYB16   | amyE::sweD-sfGFP (kan)                      | This study                   |
| pYB20   | ycgO::Pspank-sweD (spec)                    | This study                   |
| pYB21   | ycgO::Pspank-sweC (spec)                    | This study                   |
| pYB61   | yvbJ::PxylA-lytE (cat)                      | This study                   |
| pYB130  | ycgO::Pspank-sweDC( $\Delta$ 25-57) (spec)  | This study                   |
| pYB132  | ycgO::Pspank-sweDC( $\Delta$ 74-108) (spec) | This study                   |
| pYB134  | ycgO::Pspank-sweDC(D104A V105A) (spec)      | This study                   |
| pYB135  | ycgO::Pspank-sweDC( $\Delta$ LysM) (spec)   | This study                   |
| pDR244  | Ppa-cre, ori(ts) (spec) (amp)               | Wang <i>et al.</i> (2014)    |
| pWX470  | lox66-kan-lox71 (amp)                       | Meeske <i>et al.</i> (2016)  |
| pER65   | ycgO::Pspank (erm)                          | Meisner <i>et al.</i> (2013) |
| pTD68   | His6-SUMO (amp)                             | Morlot <i>et al.</i> (2010)  |
| pWX467  | lox66-erm-lox71 (amp)                       | Wang <i>et al.</i> (2014)    |
| pYB24   | T25-FtsX (kan)                              | This study                   |
| pYB26   | T18-FtsX (amp)                              | This study                   |
| pYB29   | FtsE-T25 (kan)                              | This study                   |
| pYB30   | T18-FtsE (amp)                              | This study                   |
| pYB42   | T25-FtsEX (kan)                             | This study                   |
| pYB44   | T18-FtsEX (amp)                             | This study                   |
| pYB36   | sweD-T25 (kan)                              | This study                   |
| pYB37   | sweD-T18 (amp)                              | This study                   |
| pYB39   | sweC-T18 (amp)                              | This study                   |
| pYB147  | sweD( $\Delta$ 25-57)-T18 (amp)             | This study                   |
| pYB183  | sweD(TM)-T18 (amp)                          | This study                   |
| pEB352  | T25-TolB (kan)                              | Battesti & Bouveret (2008)   |
| pEB356  | T18-Pal (amp)                               | Battesti & Bouveret (2008)   |
| pEB354  | pUT25 (kan)                                 | Gully & Bouveret (2006)      |
| pEB355  | pUT18 (amp)                                 | Gully & Bouveret (2006)      |
| pWX469  | lox66-tet-lox71 (amp)                       | Meeske <i>et al.</i> (2016)  |
