# Supplementary material for: SweC and SweD are essential co-factors of the FtsEX-CwlO cell wall hydrolase complex in Bacillus subtilis
Source: PubMed Central journal article supplement (PMC6705773; doi:10.1371/journal.pgen.1008296), 2019-08-22
Supplement: pgen.1008296.s015.pdf [file pgen.1008296.s015.pdf]

**TABLE S3: Oligonucleotide primers used in this study**

| Primers | Sequence                                                        |
|---------|-----------------------------------------------------------------|
| oYB33   | CGCACTAGTTTATCGTGTTAACGTTTTTACGATC                              |
| oYB34   | GCTCTGGCTTTTTTCTTACACC                                          |
| oYB35   | CTGAGCGAGGGAGCAGAAGGAGTTTCATCACCTTCTATTCTTTTTTATCC              |
| oYB36   | GTTGACCAGTGCTCCCTGGTCAAAAACAGGCTGACTCAGCCTG                     |
| oYB37   | CGATTCTTCTATCATCACAGG                                           |
| oYB38   | GTGAAGCTTAGAAGGTGATGAAACATGGTGGAAATTGCTATTATTGCGTTG             |
| oYB41   | GCGGGATCCCTGACTGACGAAGACCAGGCC                                  |
| oYB42   | CGCCTCGAGTTATCGTGTTAACGTTTTTACGATCTTTTTG                        |
| oYB43   | GCGGGATCCGACCCGATGAAAGATGTAGAACAGG                              |
| oYB44   | CGCCTCGAGTCATACGAGCACCTTCTCATTATCTTTG                           |
| oYB61   | GTAGCGACCGGCGCTCAGGATCCGATTATGTGCAATGTGTCCCTAAAAAAG             |
| oYB62   | AGATCCGGAACCTGATCCTGAAGGTCTACGAGCACCTTCTCATTATCTTTG             |
| oYB63   | GGACCTTCAGGATCAGGTTCCGGATCTGGCAGTAAAGGTGAAGAAGTGTTCACC          |
| oYB64   | CCAGGGGTACCGAGCTCGAATTCTATTTGTAGAGTTCATCCATGCCG                 |
| oYB67   | CGCACTAGTTCATACGAGCACCTTCTCATTATC                               |
| oYB68   | GTGAAGCTTAGAAGGTGATGAAACATGACAAAACGGGGCATTG                     |
| oYB83   | TTCAAGCTTCTCCGAAACTTACTG                                        |
| oYB84   | CTGAGCGAGGGAGCAGAAGGACAAATGAAAAGCCGTCCCGAAAAC                   |
| oYB85   | GTTGACCAGTGCTCCCTGGTCCCTTCTTTTTCTTCTATGATTACATGAAATCTC          |
| oYB86   | GAAATAGCCATCCTCACGTCC                                           |
| oYB91   | CTGCAGGGTCGACTCTAGAATTCATGATTAATAATTCTCGGGCGCC                  |
| oYB92   | CACTGCAGGTGACTCTAGAATTCATGATTAATAATTCTCGGGCGCC                  |
| oYB93   | GTGACGGTATCGATAAGCTTGATATCTTATACTCGCAGAACTTGCGG                 |
| oYB95   | CTGGCGGCTAAGCTTGCGTAATTACTCGCAGAACTTGCGGATG                     |
| oYB97   | CTGCAGGGTCGACTCTAGAATTCATGATAGAGATGAAGGAAGTATATAAAGCC           |
| oYB98   | CACTGCAGGTGACTCTAGAATTCATGATAGAGATGAAGGAAGTATATAAAGCC           |
| oYB99   | GTGACGGTATCGATAAGCTTGATATCTTAATCATATGAACCATACTCCCC              |
| oYB100  | GTAACCAGCCTGATGCGATTGCTGATCATATGAACCATACTCCCCTCTTG              |
| oYB102  | CACACAGGAAACAGCTATGACCATGATAGAGATGAAGGAAGTATATAAAGCCTATC        |
| oYB109  | GTAACCAGCCTGATGCGATTGCTGTACGAGCACCTTCTCATTATCTTTG               |
| oYB110  | CTGGCGGCTAAGCTTGCGTAATTACGAGCACCTTCTCATTATCTTTG                 |
| oYB111  | CACACAGGAAACAGCTATGACCATGGTGGAAATTGCTATTATTGCGTTG               |
| oYB113  | CTGGCGGCTAAGCTTGCGTAATTCGTGTTAACGTTTTTACGATC                    |
| oYB114  | CACACAGGAAACAGCTATGACCATGATGACAAAACGGGGCATTGAG                  |
| oYB127  | CAGCACACGCGAGCTCTTG                                             |
| oYB128  | CTGAGCGAGGGAGCAGAAGGATTTTCACGCTTCATCCCAATCATC                   |
| oYB129  | GTTGACCAGTGCTCCCTGGTACAGTGGAGTGAATAAGACAAAATC                   |
| oYB130  | CATTAATACGGCACCGACAATCAC                                        |
| oYB134  | CTGGCGGCTAAGCTTGCGTAATCTGTTCTACATCTTTCATCGGGTCTC                |
| oYB141  | CTGAGCGAGGGAGCAGAAGGAATAATAGCAATTTCCACGTTTCATCACC               |
| oYB142  | GTTGACCAGTGCTCCCTGGTCATCAAAGATAATGAGAAGGTGCTCG                  |
| oYB143  | CTGAGCGAGGGAGCAGAAGGATTGTCATACGAGCACCTTCTCATTATC                |
| oYB162  | ATGAAATAAAATGCATCTGTATTTGAATGAAGCTTGTTAACATTTGGGGAGGAAAATATG    |
| oYB163  | AAGGGTAACTATTGCCGTATGGGATCCATCTCGAGCAATGAACGGGTTTTCTCTAAAAATTAG |
| oYB313  | GTGAGCGGATAACAATTAAGCTTAGAAGGTGATGAAACATGGTGGAAATTGC            |
| oYB314  | GAGCTAGCATCTGCAGTTACTAGTTTATCGTGTTAACGTTTTTACGATCTTTTTG         |
| oYB315  | CAAGGTTTGTTCAGGCCTGATCCCGGGTCTCTTTGAGAATATGAGAATGC              |
| oYB316  | TTCTCAAAGAGACCCGGGATCAGGCCTGGAAACAAACCTTGTCATTGCG               |
| oYB319  | CTTCTCATTATCGCCTGATCCATTGATGTCGTTCTGCTTTGATTTG                  |
| oYB320  | GAACGACATCAATGGATCAGGCGATAATGAGAAGGTGCTCGTATGAC                 |
| oYB324  | GTATCAGTGAAGCAGCAAATACGATTATCAAAGATAATGAGAAGGTGC                |
| oYB325  | CGAGCTAGCATCTGCAGTTACTAGTTTATCGTGAGCTTTGTCTGATTTCTGTCTGAG       |
| oYB370  | GATCCGGATACGTCCCTGGGAAGTCATGAAGACGCTGGAGGAAATTAAC               |
| oYB371  | GTTAATTTCTCCAGCGTCTTCATGACTTCCAGGACGTATCCGGATC                  |

|        |                                                    |
|--------|----------------------------------------------------|
| oYB372 | GAAACACATGGATGACATTTGCATCCATTAGTGCTGTAACCGTTACGCTG |
| oYB373 | CAGCGTAACGGTTACAGCACTAATGGATGCAAATGTCATCCATGTGTTTC |
| oJM28  | TTCTGCTCCCTCGCTCAG                                 |
| oJM29  | CAGGGAGCACTGGTCAAC                                 |
| oJM54  | TGCTATCGGAGAGCATTGG                                |
| oJM103 | ATTAAGCTTGTCCCGGGTAAGTTAACATTTGGGGAGGAAAATATG      |
| oJM104 | CCACCGAATTAGCTTGCATGCAATGAACGGGTTTTCTCTAAAAATTAG   |

---

---
